# Supplementary material
Source: PubMed Central journal article supplement (PMC3147590)
Supplement: supp_79_8_3204__1.pdf [file supp_79_8_3204__1.pdf]

**SUPPLEMENTARY TABLE 1A. Estimated survival time means and standard errors (standard deviation of the means) for each inbred strain of the susceptibility Groups**

| <b>Susceptibility group</b> | <b>Inbred strain</b> | <b>Estimated mean TTD (hours)*</b> | <b>Standard error</b> |
|-----------------------------|----------------------|------------------------------------|-----------------------|
| Susceptible                 | DBA/2J               | 45.90                              | 2.05                  |
|                             | NOD/LtJ              | 45.12                              | 1.94                  |
|                             | DBA/1J               | 45.78                              | 2.62                  |
|                             | A/J                  | 47.84                              | 2.48                  |
|                             | FVB/NJ               | 47.98                              | 1.95                  |
| Intermediate                | NON/LtJ              | 56.49                              | 2.30                  |
|                             | 129S1/SvImJ          | 57.58                              | 3.14                  |
|                             | BPL/1J               | 58.88                              | 3.09                  |
|                             | SPRET/EiJ            | 72.60                              | 3.40                  |
|                             | C3H/HeJ              | 72.34                              | 2.58                  |
|                             | CAST/EiJ             | 78.97                              | 2.44                  |
|                             | C57BL/10J            | 82.20                              | 2.47                  |
| Resistant                   | C57BL/6J             | 94.74                              | 6.67                  |
|                             | BALB/cJ              | 108.03                             | 9.80                  |

\* Estimated mean time-to-death (TTD) was calculated based on both male and female survival data using ANOVA

**SUPPLEMENTARY TABLE 1B. Pair-wise comparison of survival time means of inbred strains across all susceptibility groups**

| <b>Strain A</b> | <b>Strain B</b> | <b>Difference between TTD means (strain A minus strain B)</b> | <b>P-value*</b> |
|-----------------|-----------------|---------------------------------------------------------------|-----------------|
| 1               | 2               | 0.78                                                          | 0.780           |
| 1               | 3               | 0.12                                                          | 0.970           |
| 1               | 4               | -1.94                                                         | 0.550           |
| 1               | 5               | -2.08                                                         | 0.460           |
| 1               | 6               | -10.59                                                        | <0.001          |
| 1               | 7               | -11.68                                                        | 0.002           |
| 1               | 8               | -12.98                                                        | <0.001          |
| 1               | 9               | -26.70                                                        | <0.001          |
| 1               | 10              | -26.44                                                        | <0.001          |
| 1               | 11              | -33.07                                                        | <0.001          |
| 1               | 12              | -36.30                                                        | <0.001          |
| 1               | 13              | -48.84                                                        | <0.001          |
| 1               | 14              | -62.13                                                        | <0.001          |
| 2               | 3               | -0.66                                                         | 0.840           |

|   |    |        |        |
|---|----|--------|--------|
| 2 | 4  | -2.73  | 0.390  |
| 2 | 5  | -2.86  | 0.300  |
| 2 | 6  | -11.38 | <0.001 |
| 2 | 7  | -12.46 | 0.001  |
| 2 | 8  | -13.76 | <0.001 |
| 2 | 9  | -27.48 | <0.001 |
| 2 | 10 | -27.23 | <0.001 |
| 2 | 11 | -33.85 | <0.001 |
| 2 | 12 | -37.08 | <0.001 |
| 2 | 13 | -49.63 | <0.001 |
| 2 | 14 | -62.92 | <0.001 |
|   |    |        |        |
| 3 | 4  | -2.06  | 0.570  |
| 3 | 5  | -2.20  | 0.500  |
| 3 | 6  | -10.71 | 0.002  |
| 3 | 7  | -11.80 | 0.005  |
| 3 | 8  | -13.10 | 0.001  |
| 3 | 9  | -26.82 | <0.001 |
| 3 | 10 | -26.56 | <0.001 |
| 3 | 11 | -33.19 | <0.001 |
| 3 | 12 | -36.41 | <0.001 |
| 3 | 13 | -48.96 | <0.001 |
| 3 | 14 | -62.25 | <0.001 |
|   |    |        |        |
| 4 | 5  | -0.14  | 0.970  |
| 4 | 6  | -8.65  | 0.011  |
| 4 | 7  | -9.73  | 0.016  |
| 4 | 8  | -11.04 | 0.006  |
| 4 | 9  | -24.75 | <0.001 |
| 4 | 10 | -24.50 | <0.001 |
| 4 | 11 | -31.12 | <0.001 |
| 4 | 12 | -34.35 | <0.001 |
| 4 | 13 | -46.90 | <0.001 |
| 4 | 14 | -60.19 | <0.001 |
|   |    |        |        |
| 5 | 6  | -8.51  | 0.005  |
| 5 | 7  | -9.60  | 0.010  |
| 5 | 8  | -10.90 | 0.003  |
| 5 | 9  | -24.62 | <0.001 |
| 5 | 10 | -24.36 | <0.001 |
| 5 | 11 | -30.99 | <0.001 |
| 5 | 12 | -34.22 | <0.001 |
| 5 | 13 | -46.76 | <0.001 |
| 5 | 14 | -60.05 | <0.001 |
|   |    |        |        |

|    |    |        |        |
|----|----|--------|--------|
| 6  | 7  | -1.08  | 0.780  |
| 6  | 8  | -2.39  | 0.540  |
| 6  | 9  | -16.10 | <0.001 |
| 6  | 10 | -15.85 | <0.001 |
| 6  | 11 | -22.47 | <0.001 |
| 6  | 12 | -25.70 | <0.001 |
| 6  | 13 | -38.25 | <0.001 |
| 6  | 14 | -51.54 | <0.001 |
|    |    |        |        |
| 7  | 8  | -1.30  | 0.770  |
| 7  | 9  | -15.02 | 0.001  |
| 7  | 10 | -14.77 | <0.001 |
| 7  | 11 | -21.39 | <0.001 |
| 7  | 12 | -24.62 | <0.001 |
| 7  | 13 | -37.17 | <0.001 |
| 7  | 14 | -50.46 | <0.001 |
|    |    |        |        |
| 8  | 9  | -13.72 | 0.003  |
| 8  | 10 | -13.46 | 0.001  |
| 8  | 11 | -20.09 | <0.001 |
| 8  | 12 | -23.32 | <0.001 |
| 8  | 13 | -35.86 | <0.001 |
| 8  | 14 | -49.15 | <0.001 |
|    |    |        |        |
| 9  | 10 | 0.25   | 0.950  |
| 9  | 11 | -6.37  | 0.130  |
| 9  | 12 | -9.60  | 0.024  |
| 9  | 13 | -22.15 | 0.004  |
| 9  | 14 | -35.44 | <0.001 |
|    |    |        |        |
| 10 | 11 | -6.62  | 0.064  |
| 10 | 12 | -9.85  | 0.007  |
| 10 | 13 | -22.40 | 0.002  |
| 10 | 14 | -35.69 | <0.001 |
|    |    |        |        |
| 11 | 12 | -3.23  | 0.350  |
| 11 | 13 | -15.77 | 0.028  |
| 11 | 14 | -29.07 | 0.005  |
|    |    |        |        |
| 12 | 13 | -12.55 | 0.080  |
| 12 | 14 | -25.84 | 0.012  |
|    |    |        |        |
| 13 | 14 | -13.29 | 0.260  |

\*P-values test equality of means A and B. P-values are adjusted by Fisher's Protection Level for multiple comparisons.
